# Supplementary material for: l-3,4-dihydroxyphenylalanine-collagen modified PDMS surface for controlled cell culture
Source: Royal Society of Chemistry journal article supplement (doi:10.1039/c2jm00104g), 2012-01-01
Supplement: c2jm00104g.pdf [file c2jm00104g.pdf]

*Supporting Information*

## ***L*-3,4-dihydroxyphenylalanine-Collagen Modified PDMS Surface for Controlled Cell Culture**

Chun-Ying Gao<sup>†,‡</sup>, Yuan-Yuan Guo<sup>‡,‡</sup>, Jia He<sup>§,‡</sup>, Ming Wu<sup>†</sup>, Yang Liu<sup>†</sup>, Zhong-Liang Chen<sup>†</sup>, Wen-Sheng Cai<sup>§</sup>, Yan-Lian Yang<sup>‡,\*</sup>, Chen Wang<sup>‡</sup>, Xi-Zeng Feng<sup>†,\*</sup>

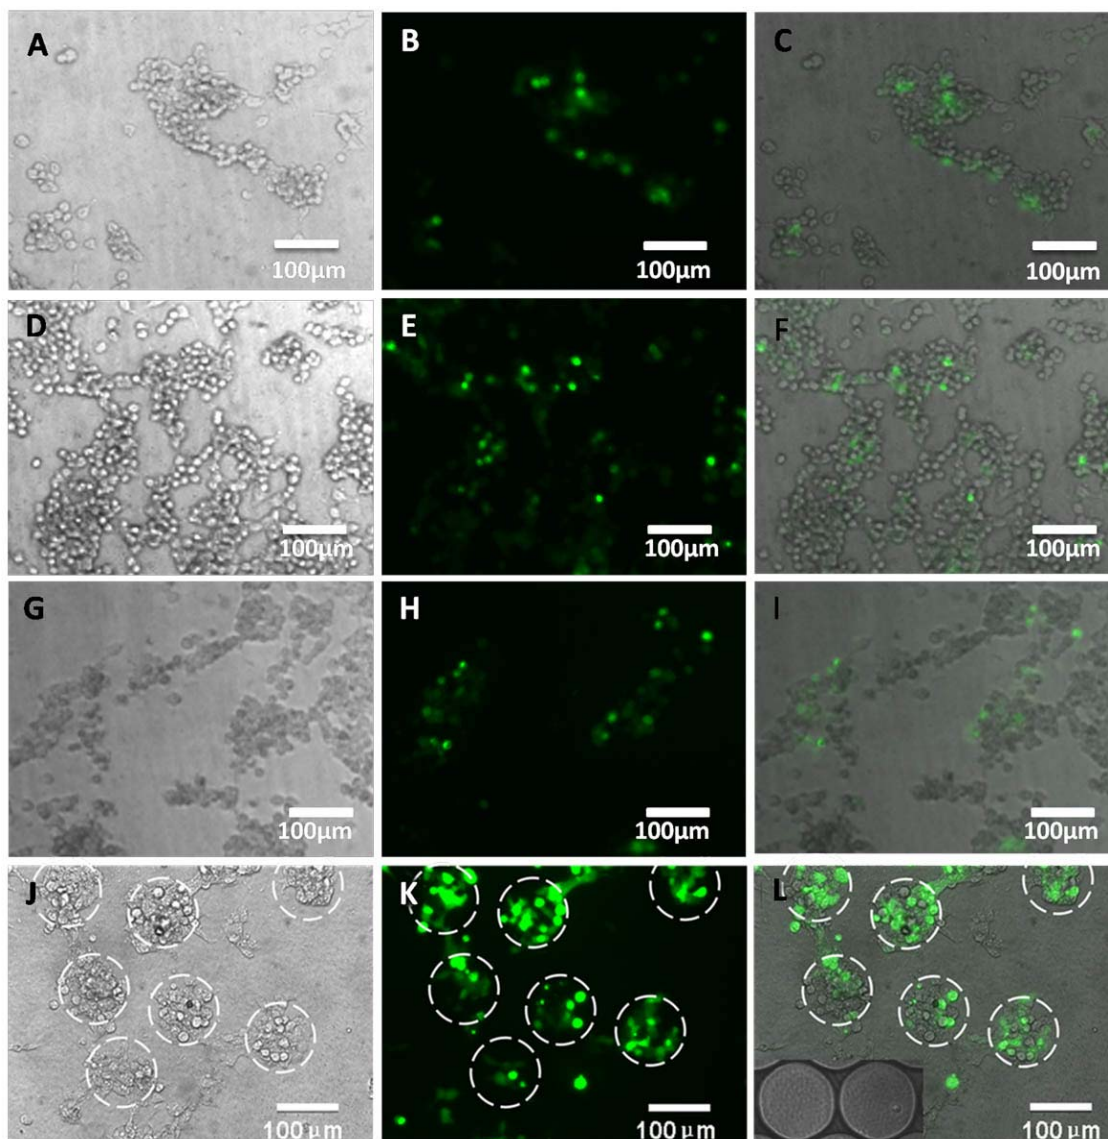

**Figure S1** Fluorescence images of the 293T cells growing on the PDMS, *L*-Dopa patterned PDMS and *L*-Dopa-collagen patterned PDMS surface showing good cell growth and activity behaviors. (Optical images of cells on PDMS surface (A), *L*-Dopa patterned surface (D) and *L*-Dopa-collagen patterned surface (G); fluorescence image of cells on PDMS surface (B), *L*-Dopa patterned surface (E) and *L*-Dopa-collagen patterned surface (H); merged optical and fluorescence image of cells on PDMS surface (C), *L*-Dopa patterned surface (F) and *L*-Dopa-collagen patterned surface (I).
